# Supplementary material for: Mechanochromism of a dumbbell D–π–A–π–D phenothiazine derivative
Source: Royal Society of Chemistry journal article supplement (doi:10.1039/c9nj03198g), 2019-01-01
Supplement: c9nj03198g1.pdf [file c9nj03198g1.pdf]

## Supporting information for

### Mechanochromism of dumbbell D- $\pi$ -A- $\pi$ -D phenothiazine derivative

Sisi Wang,<sup>a</sup> Lingbo Li,<sup>d</sup> Kechang Li,<sup>e</sup> Tong Zhang,<sup>b</sup> Zhen Zhao,<sup>a,c\*</sup> Pengchong Xue<sup>b\*</sup>

<sup>a</sup> Department of Translational Medicine, the First Hospital of Jilin University, No. 519 Dongminzhu Street, Changchun, P. R. China;

<sup>b</sup> Tianjin Key Laboratory of Structure and Performance for Functional Molecules, MEO Key Laboratory of Inorganic-Organic Hybrid Functional Material Chemistry, College of Chemistry, Tianjin Normal University, No. 393 Bin Shui West Road, Tianjin, 300387, P. R. China;

<sup>c</sup> Department of Blood Transfusion, the First Hospital of Jilin University, No. 71 Xinmin Street Changchun, P. R. China;

<sup>d</sup> Department of Research and Development, Changchun Bioxun Biotechnology Limited Company, No. 285 Xinpu Road, Yuanda Street, Changchun, P. R. China;

<sup>e</sup> College of Chemistry, Jilin University, No. 2699, Qianjin Street, Changchun, PR China  
Email: xiaomaomao1975@126.com; xuepengchong@126.com

---

\* Corresponding authors. Email address: xiaomaomao1975@126.com; xuepengchong@126.com

**Table S1.** Photophysical data of PBPAN obtained by quantum chemical calculation.

|           | Transition assignment  | Transition energy (eV) | Maximal absorption (nm) | Oscillator strength |
|-----------|------------------------|------------------------|-------------------------|---------------------|
| PBPA<br>N | HOMO-1→ LUMO (4.35%)   | 2.5898                 | 478.74                  | 1.4546              |
|           | HOMO→ LUMO (94.83%)    |                        |                         |                     |
|           | HOMO-2→ LUMO+1 (2.02%) | 2.8063                 | 441.81                  | 0.00                |
|           | HOMO-1→ LUMO (93.55%)  |                        |                         |                     |
|           | HOMO→ LUMO+1 (2.79%)   |                        |                         |                     |

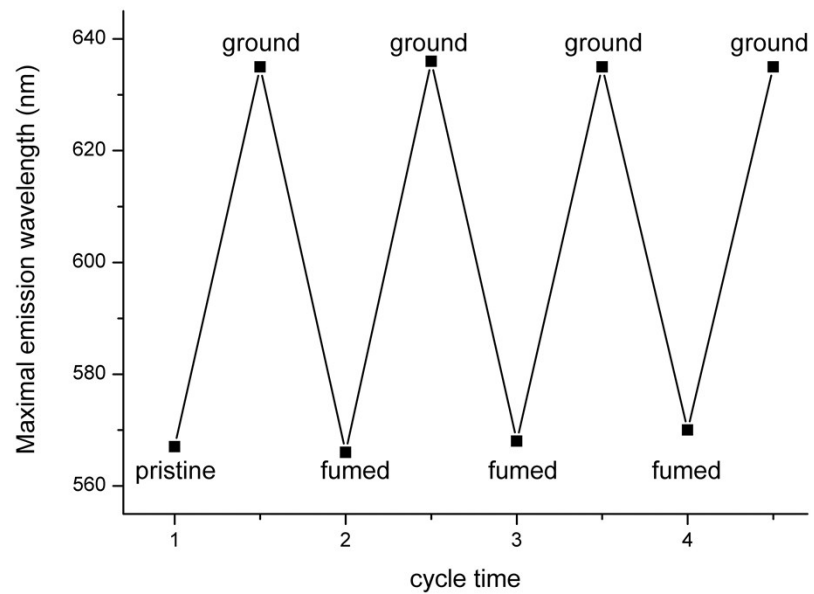

**Fig. S1** The plot of maximal emission wavelengths vs cycle times.

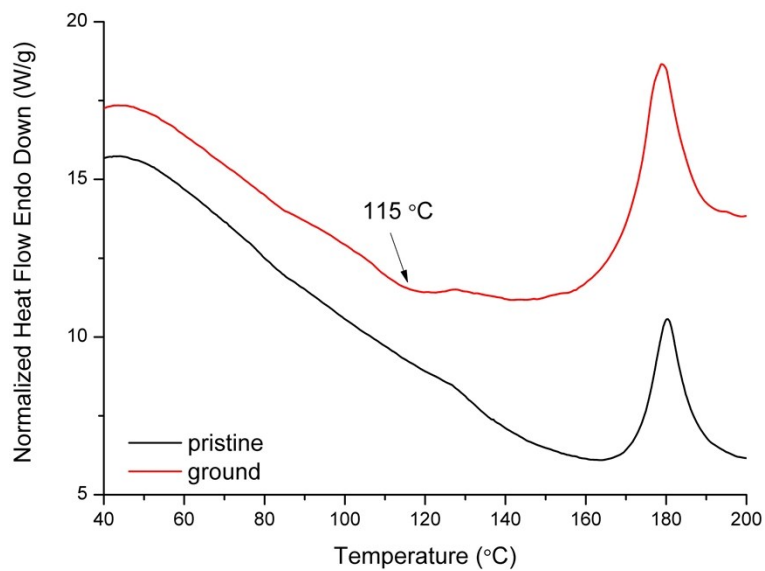

**Fig. S2** DSC curves of PBPAN in pristine and ground states.

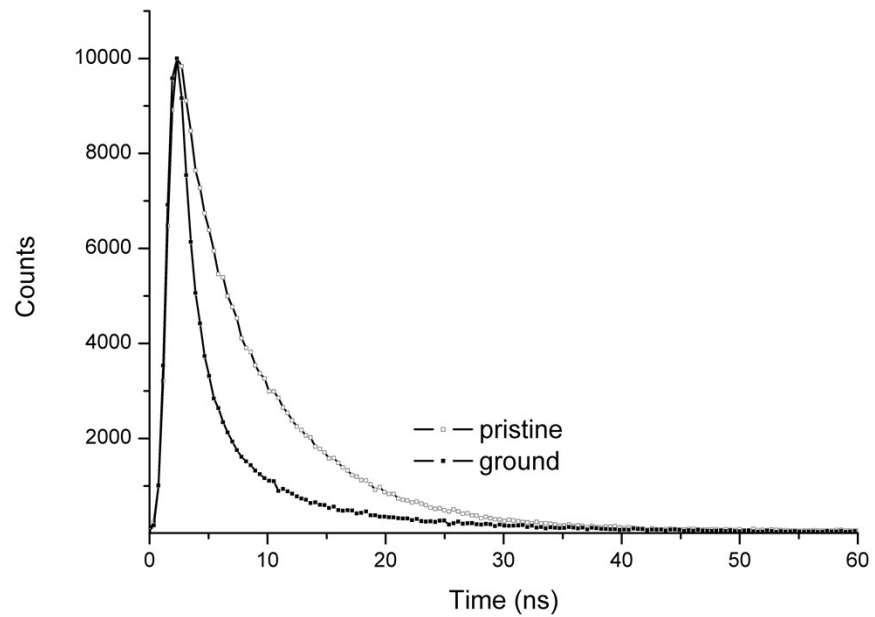

**Fig. S3** Time-resolved fluorescence spectra of PBPAN in pristine and ground states. Excitation wavelengths of pristine and ground solids are 570 and 635 nm, respectively.
